# Supplementary material for: Theoretical exploration of the nitrogen fixation mechanism of two-dimensional dual-metal FeTM@GY (TM = Fe, Mo, Co, and V) electrocatalysts
Source: Royal Society of Chemistry journal article supplement (doi:10.1039/d3dt04384c), 2024-01-01
Supplement: d3dt04384c1.pdf [file d3dt04384c1.pdf]

Supporting Information

**Theoretical exploration of the nitrogen fixation mechanism of two-dimensional dual-metal FeTM@GY (TM=Fe, Mo, Co, and V) electrocatalysts**

Lin Yuan,<sup>a, b, c</sup> Qinglong Fang,<sup>a, b, c,\*</sup> Baiyu Zhang<sup>d</sup>

*<sup>a</sup>School of Science, Xi'an Polytechnic University, Xi'an 710048, Shaanxi, China*

*<sup>b</sup>Engineering Research Center of Flexible Radiation Protection Technology, University of Shaanxi Province, Xi'an Polytechnic University, Xi'an 710048, Shaanxi, China*

*<sup>c</sup>Xi'an Key Laboratory of Nuclear Protection Textile Equipment Technology, Xi'an Polytechnic University, Xi'an 710048, Shaanxi, China*

*<sup>d</sup>Materials Department, University of California, Santa Barbara, California 93106-5050, United States*

\* Corresponding authors.

E-mail addresses: qinglong\_fang@xpu.edu.cn (Qinglong Fang).

**Table S1** Binding energy ( $E_b$ ) of FeTM@GY (TM = Fe, Mo, Co, and V), bond lengths of Fe and TM atoms  $d_{\text{Fe-TM}}$ , average values of bond lengths of Fe and TM atoms to C atoms  $\bar{d}_{\text{Fe-C}}$  and  $\bar{d}_{\text{TM-C}}$ , respectively, and bond lengths between Fe and TM atoms to GY Bader charge transfer  $Q_{\text{Fe}}$  and  $Q_{\text{TM}}$ .

|         | $E_b$ (eV) | $d_{\text{Fe-TM}}$ (Å) | $\bar{d}_{\text{Fe-C}}$ (Å) | $\bar{d}_{\text{TM-C}}$ (Å) | $Q_{\text{Fe}}$ ( $e$ ) | $Q_{\text{TM}}$ ( $e$ ) |
|---------|------------|------------------------|-----------------------------|-----------------------------|-------------------------|-------------------------|
| FeFe@GY | -2.92      | 2.20                   | 2.00                        | 1.99                        | -0.56                   | -0.58                   |
| FeMo@GY | -3.49      | 2.12                   | 1.98                        | 2.09                        | -0.40                   | -0.83                   |
| FeCo@GY | -2.66      | 2.20                   | 2.00                        | 1.96                        | -0.67                   | -0.40                   |
| FeV@GY  | -2.90      | 2.04                   | 1.97                        | 2.08                        | -0.31                   | -1.00                   |

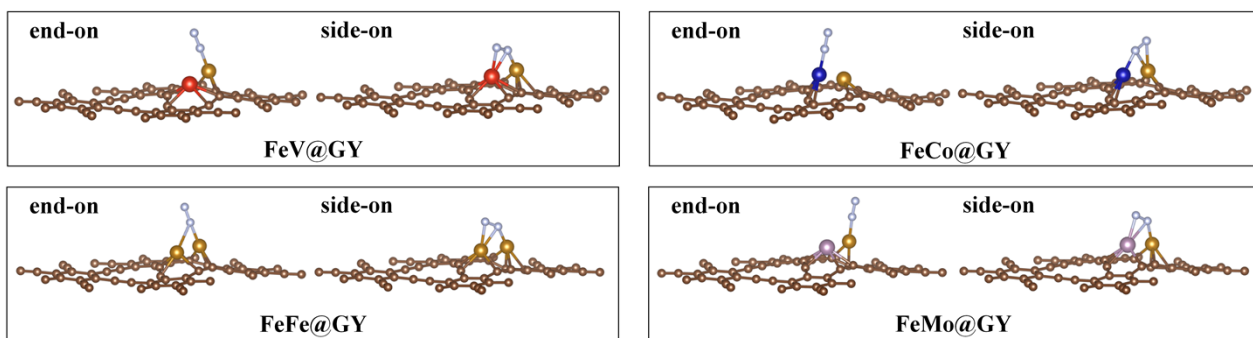

**Fig. S1** Optimized structures of N<sub>2</sub> molecules adsorbed on FeTM@GY (TM = Fe, Mo, Co, and V) via end-on and side-on configurations.

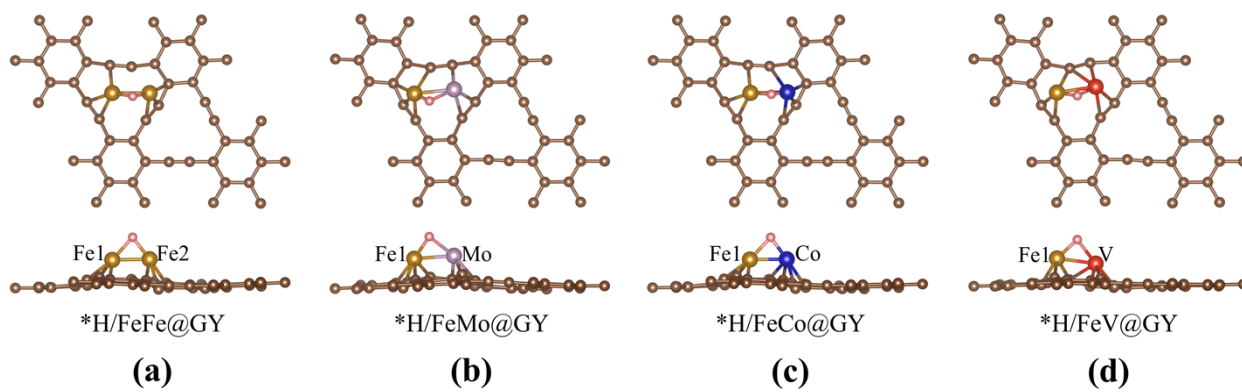

**Fig. S2** Optimized structures of H atom adsorption on FeTM@GY: (a) Fe, (b) Mo, (c) Co and (d) V.

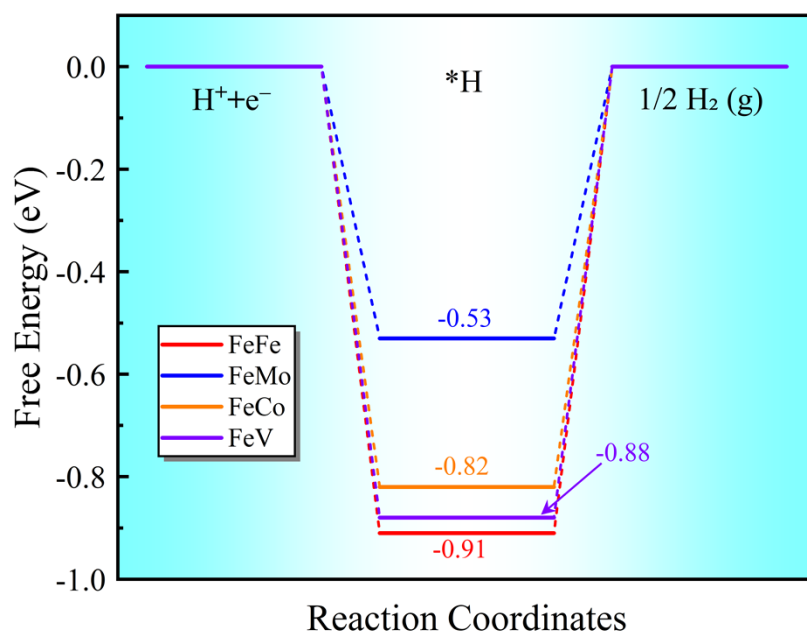

**Fig. S3** Gibbs free energy diagram of  $H^+$  on FeTM@GY (TM = Fe, Mo, Co, V) for HER.

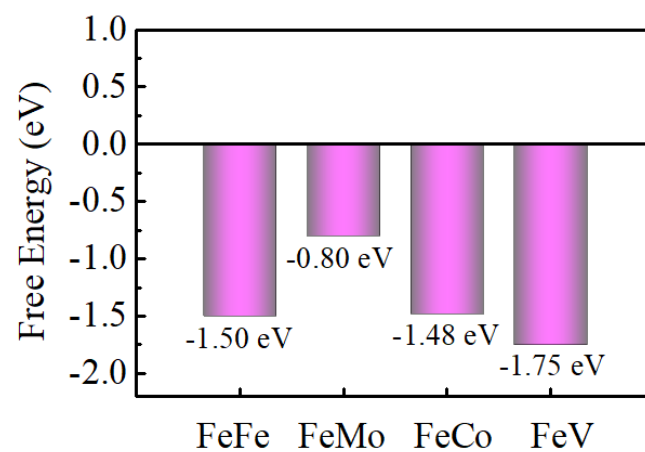

**Fig. S4** Free energies of \*H [ $\Delta G(*H)$ ] adsorption on FeFe, FeMo, FeCo, and FeV@GY under the corresponding electrode potential of -0.59, -0.27, -0.66, and -0.84 V for NRR, respectively.
